# Supplementary material
Source: Springer Nature journal article supplement (https://www.springermedizin.de/resource/supplementary/12974_2011_363_MOESM1_ESM.pdf/9601526)

## ICAM-1

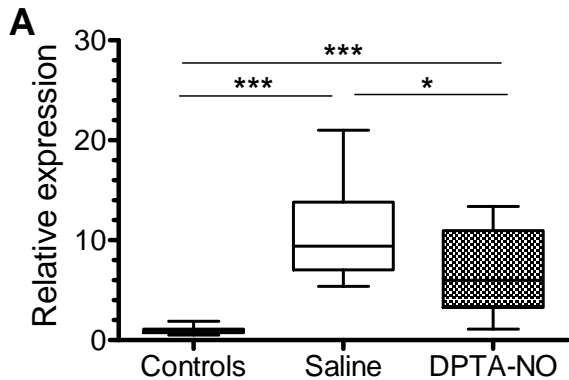

## VCAM-1

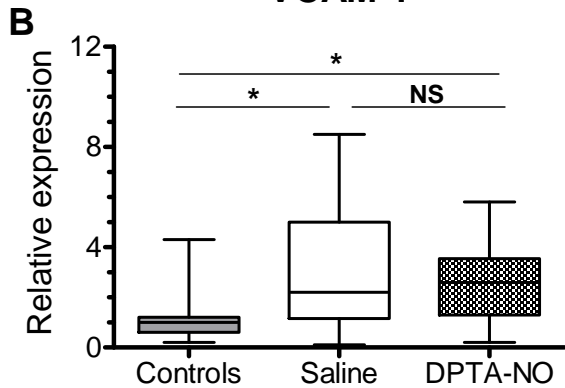

## P-selectin

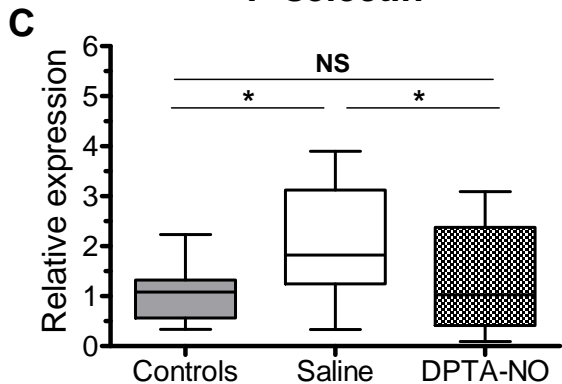

## E-selectin

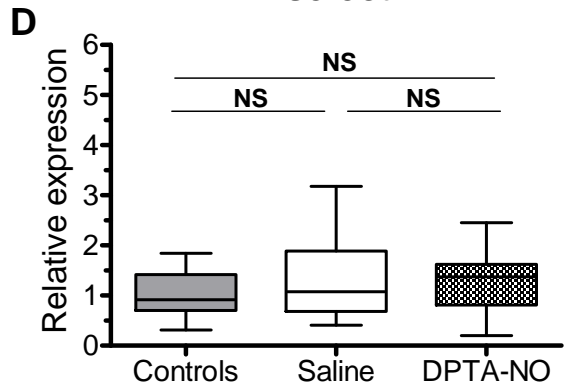

Supplement: MOESM1 [file 9601526]
